# Supplementary material
Source: PubMed Central journal article supplement (PMC7747348)
Supplement: 40820_2018_217_MOESM1_ESM.pdf [file 40820_2018_217_MOESM1_ESM.pdf]

Supporting Information for

**A Novel Hierarchical Porous 3 D Structure Vanadium Nitride/Carbon Membrane for high performance Supercapacitor Negative Electrodes**

Yage Wu<sup>1</sup>, Yunlong Yang<sup>1</sup>, Xiaoning Zhao<sup>1</sup>, Yongtao Tan<sup>1</sup>, Ying Liu<sup>1</sup>, Zhen Wang<sup>1</sup>,

Fen Ran<sup>1,2</sup>.

<sup>1</sup>State Key Laboratory of Advanced Processing and Recycling of Non-ferrous Metals, Lanzhou University of Technology, Lanzhou 730050, People's Republic of China

<sup>2</sup>School of Material Science and Engineering, Lanzhou University of Technology, Lanzhou 730050, Gansu, People's Republic of China

\*Corresponding author. E-mail: [ranfen@163.com](mailto:ranfen@163.com); or [ranfen@lut.cn](mailto:ranfen@lut.cn) (Fen Ran)

**Supplementary Figures and Tables**

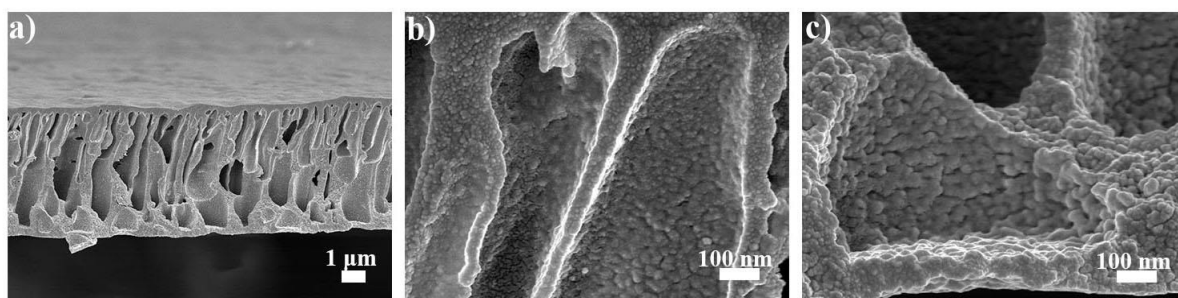

**Fig. S1** SEM images: **a-c** the cross-section views of VN/C (II)

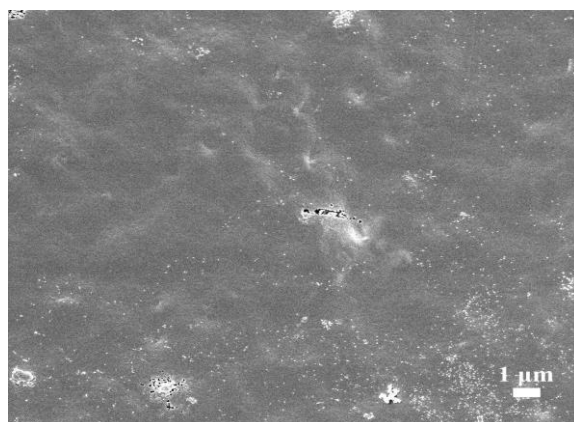

**Fig. S2** The surface SEM view of VN/C (II)

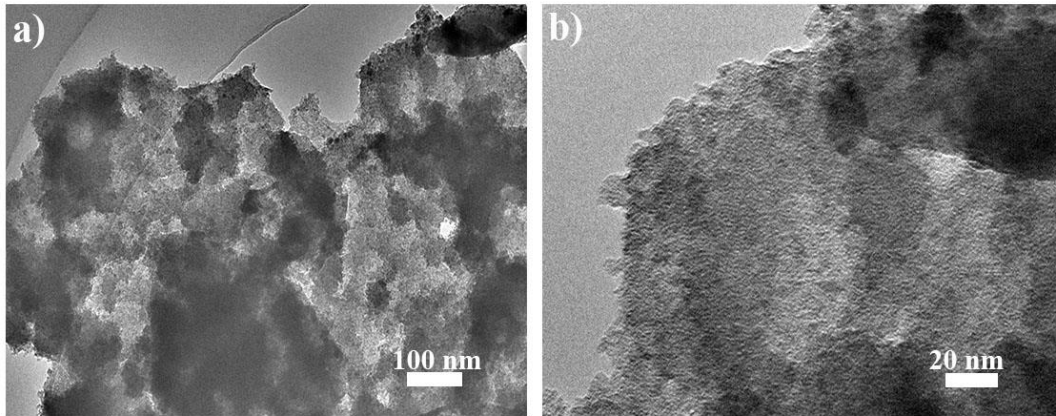

**Fig. S3** The TEM images in different magnification multiples of VN/C (II)

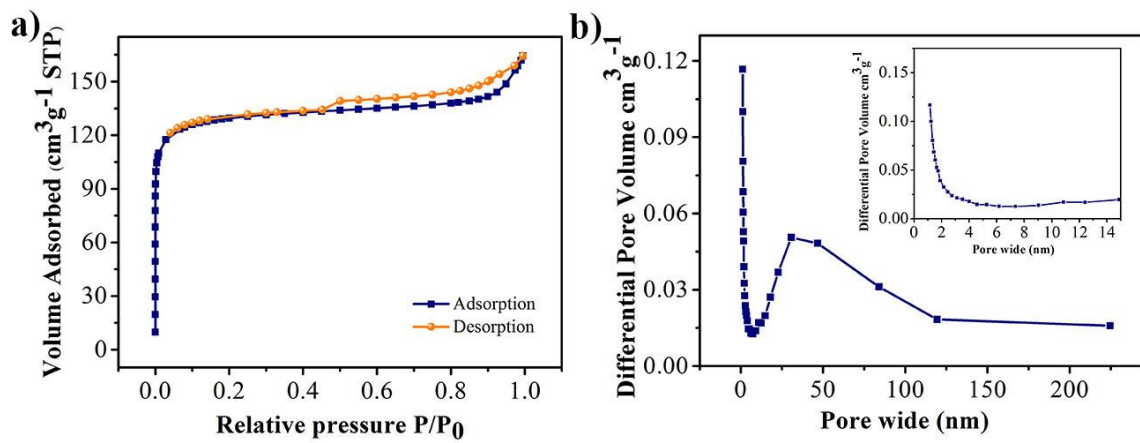

**Fig. S4 a**  $N_2$  adsorption-desorption isotherms, and **b** pore size distribution of VN/C (II)

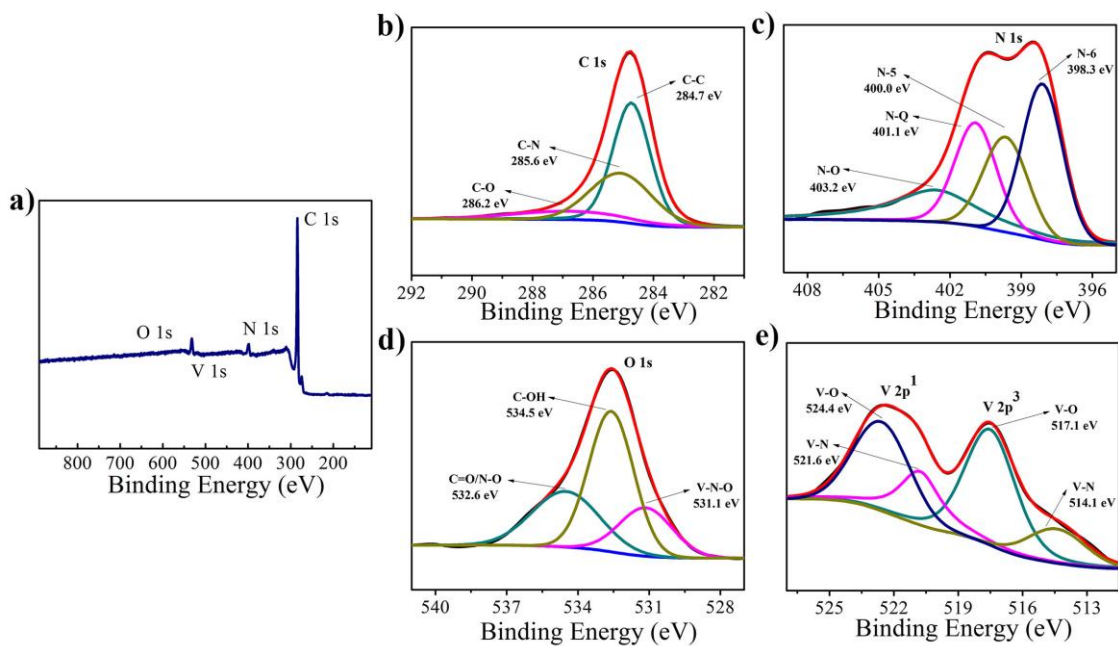

**Fig. S5** X-ray photoelectron spectra of VN/C (II)

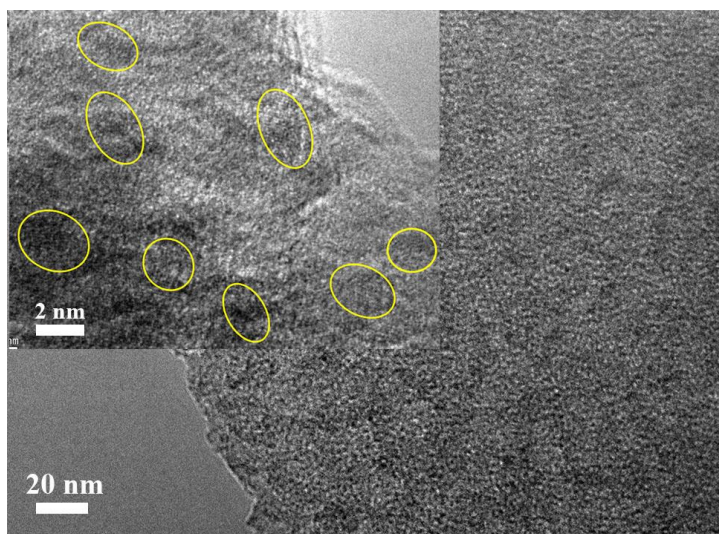

**Fig. S6** TEM images of VN/C (I) after cycling

**Table S1** BET surface areas and pore volumes of the samples

| Samples   | BET Surface Area (m <sup>2</sup> g <sup>-1</sup> ) | t-Plot Micropore Area (m <sup>2</sup> g <sup>-1</sup> ) | Total Pore Volume (cm <sup>3</sup> g <sup>-1</sup> ) | Micropore Volume (cm <sup>3</sup> g <sup>-1</sup> ) | Micropore Area Ratio |
|-----------|----------------------------------------------------|---------------------------------------------------------|------------------------------------------------------|-----------------------------------------------------|----------------------|
| VN/C (II) | 504.2                                              | 485.9                                                   | 0.25                                                 | 0.19                                                | 76.0 %               |
| VN/C (I)  | 523.5                                              | 501.8                                                   | 0.24                                                 | 0.10                                                | 83.5 %               |

**Table S2** Elemental analysis and XPS surface characterization of the VN/C (I) and VN/C (II)

| Sample    | C<br>at% | N<br>at% | O<br>at% | V<br>at% | C-O<br>at% | N-O<br>at% | C-OH<br>at% |
|-----------|----------|----------|----------|----------|------------|------------|-------------|
| VN/C (I)  | 88.0     | 3.6      | 6.1      | 2.3      | 20.0       | 20.9       | 29.7        |
| VN/C (II) | 87.8     | 4.2      | 5.3      | 2.7      | 17.1       | 12.3       | 16.9        |

**Table S3** The electrochemical performance of various VN-based electrodes reported in literature

| Negative materials | Supercapacitors (SCs)                                                 | Electrolyte Solution                          | Specific capacitance of SCs             | $E_{\max}$ (Wh $kg^{-1}$ ) | $P_{\max}$ (W $kg^{-1}$ ) | Voltage Window | References (year) |
|--------------------|-----------------------------------------------------------------------|-----------------------------------------------|-----------------------------------------|----------------------------|---------------------------|----------------|-------------------|
| VN                 | VN//VN Symmetric SCs                                                  | aqueous 2 M KOH                               | 17.5 F $g^{-1}$ at 1 A                  | 2.7                        | 4800                      | 0~1 V          | [1] (2014)        |
| VNQDs/PC           | VNQDs/PC//VNQDs/PC Symmetric SCs                                      | aqueous 6 M KOH                               | 53.75 F $g^{-1}$ at 0.5 A               | 10.7                       | 3000                      | 0~1.2 V        | [2] (2016)        |
| VN/CNTs            | VN/CNTs//VN/CNTs Symmetric SCs                                        | aqueous 6 M KOH                               | —                                       | 4                          | 1000                      | 0~1 V          | [3] (2011)        |
| AC                 | AC//V <sub>2</sub> O <sub>5</sub> ·0.6H <sub>2</sub> O Asymmetric SCs | aqueous 0.5 M K <sub>2</sub> SO <sub>4</sub>  | 64.4 F $g^{-1}$ at current rate of 2C   | 29.0                       | 2000                      | 0~1.8 V        | [4] (2009)        |
| VN-MWCNT           | VN-MWCNT//MnO <sub>2</sub> -MWCNT Asymmetric SCs                      | aqueous 0.5 M Na <sub>2</sub> SO <sub>4</sub> | 86 F $g^{-1}$ at 0.25 mA $cm^{-2}$      | 38.7                       | 316                       | 0~1.8 V        | [5] (2014)        |
| PCNS@VN NP         | PCNS@VNNP//NiO Asymmetric SCs                                         | aqueous 2 M KOH                               | 75 F $g^{-1}$ at 1 A                    | 16                         | 800                       | 0~1.6 V        | [6] (2016)        |
| VNQD/CNF           | VNQD/CNF//Ni(OH) <sub>2</sub> Asymmetric SCs                          | aqueous 6 M KOH                               | 93.5 F $g^{-1}$ at 1 A                  | 31.2                       | 3875                      | 0~1.55 V       | [7] (2017)        |
| <b>VN/C (I)</b>    | <b>VN/C-M // Ni(OH)<sub>2</sub> Asymmetric SCs</b>                    | <b>aqueous 6 M KOH</b>                        | <b>122 F <math>g^{-1}</math> at 1 A</b> | <b>43.0</b>                | <b>4000</b>               | <b>0~1.6 V</b> | <b>our work</b>   |

## References

- [1] R. Wang, X. Yan, J. Lang, A hybrid supercapacitor based on flower-like Co(OH)<sub>2</sub> and urchin-like VN electrode materials. *J. Mater. Chem. A* **2**, 12724-12732 (2014). <https://doi.org/10.1039/C4TA01296H>
- [2] Y. Yang, L. Zhao, K. Shen, Y. Liu, X. Zhao, J. Wu, F. Ran, Ultra-small vanadium nitride quantum dots embedded in porous carbon as high performance electrode materials for

- capacitive energy storage. *J. Power Sources* **333**, 61-71 (2016).  
<https://doi.org/10.1016/j.jpowsour.2016.09.151>
- [3] C. Ghimbeu, E. Raymundo-Pi-ero, P. Fioux, Vanadium nitride/carbon nanotube nanocomposites as electrodes for supercapacitors. *J. Mater. Chem.* **21**, 13268-13275 (2011). <https://doi.org/10.1039/c1jm11014d>
- [4] Q. Qu, Y. Shi, L. Li,  $V_2O_5 \cdot 0.6 H_2O$  nanoribbons as cathode material for asymmetric supercapacitor in  $K_2SO_4$  solution. *Electrochem. Commun.* **11**, 1325-1328 (2009).  
<https://doi.org/10.1016/j.elecom.2009.05.003>
- [5] Y. Su, I. Zhitomirsky, Hybrid  $MnO_2$ /carbon nanotube-VN/carbon nanotube supercapacitors. *J. Power Sources* **267**, 235-242 (2014).  
<https://doi.org/10.1016/j.jpowsour.2014.05.091>
- [6] Y. Liu, L. Liu, L. Kong, L. Kang, F. Ran, Supercapacitor electrode based on nano-vanadium nitride incorporated on porous carbon nanospheres derived from ionic amphiphilic block copolymers & vanadium-contained ion assembly systems. *Electrochim. Acta* **211**, 469-477 (2016). <https://doi.org/10.1016/j.electacta.2016.06.058>
- [7] Y. Wu, F. Ran, Vanadium nitride quantum dot/nitrogen-doped microporous carbon nanofibers electrode for high-performance supercapacitors. *J. Power Sources* **344**, 1-10. (2017). <https://doi.org/10.1016/j.jpowsour.2017.01.095>
